# Supplementary material for: Technical note: A high-resolution inverse modelling technique for estimating surface CO 2 fluxes based on the NIES-TM – FLEXPART coupled transport model and its adjoint
Source: Copernicus journal article supplement (doi:10.5194/acp-2020-251), 2020-03-27

1. Time series plots for monitoring sites used in inversion (blue – observed, plum – forward, green – optimized)

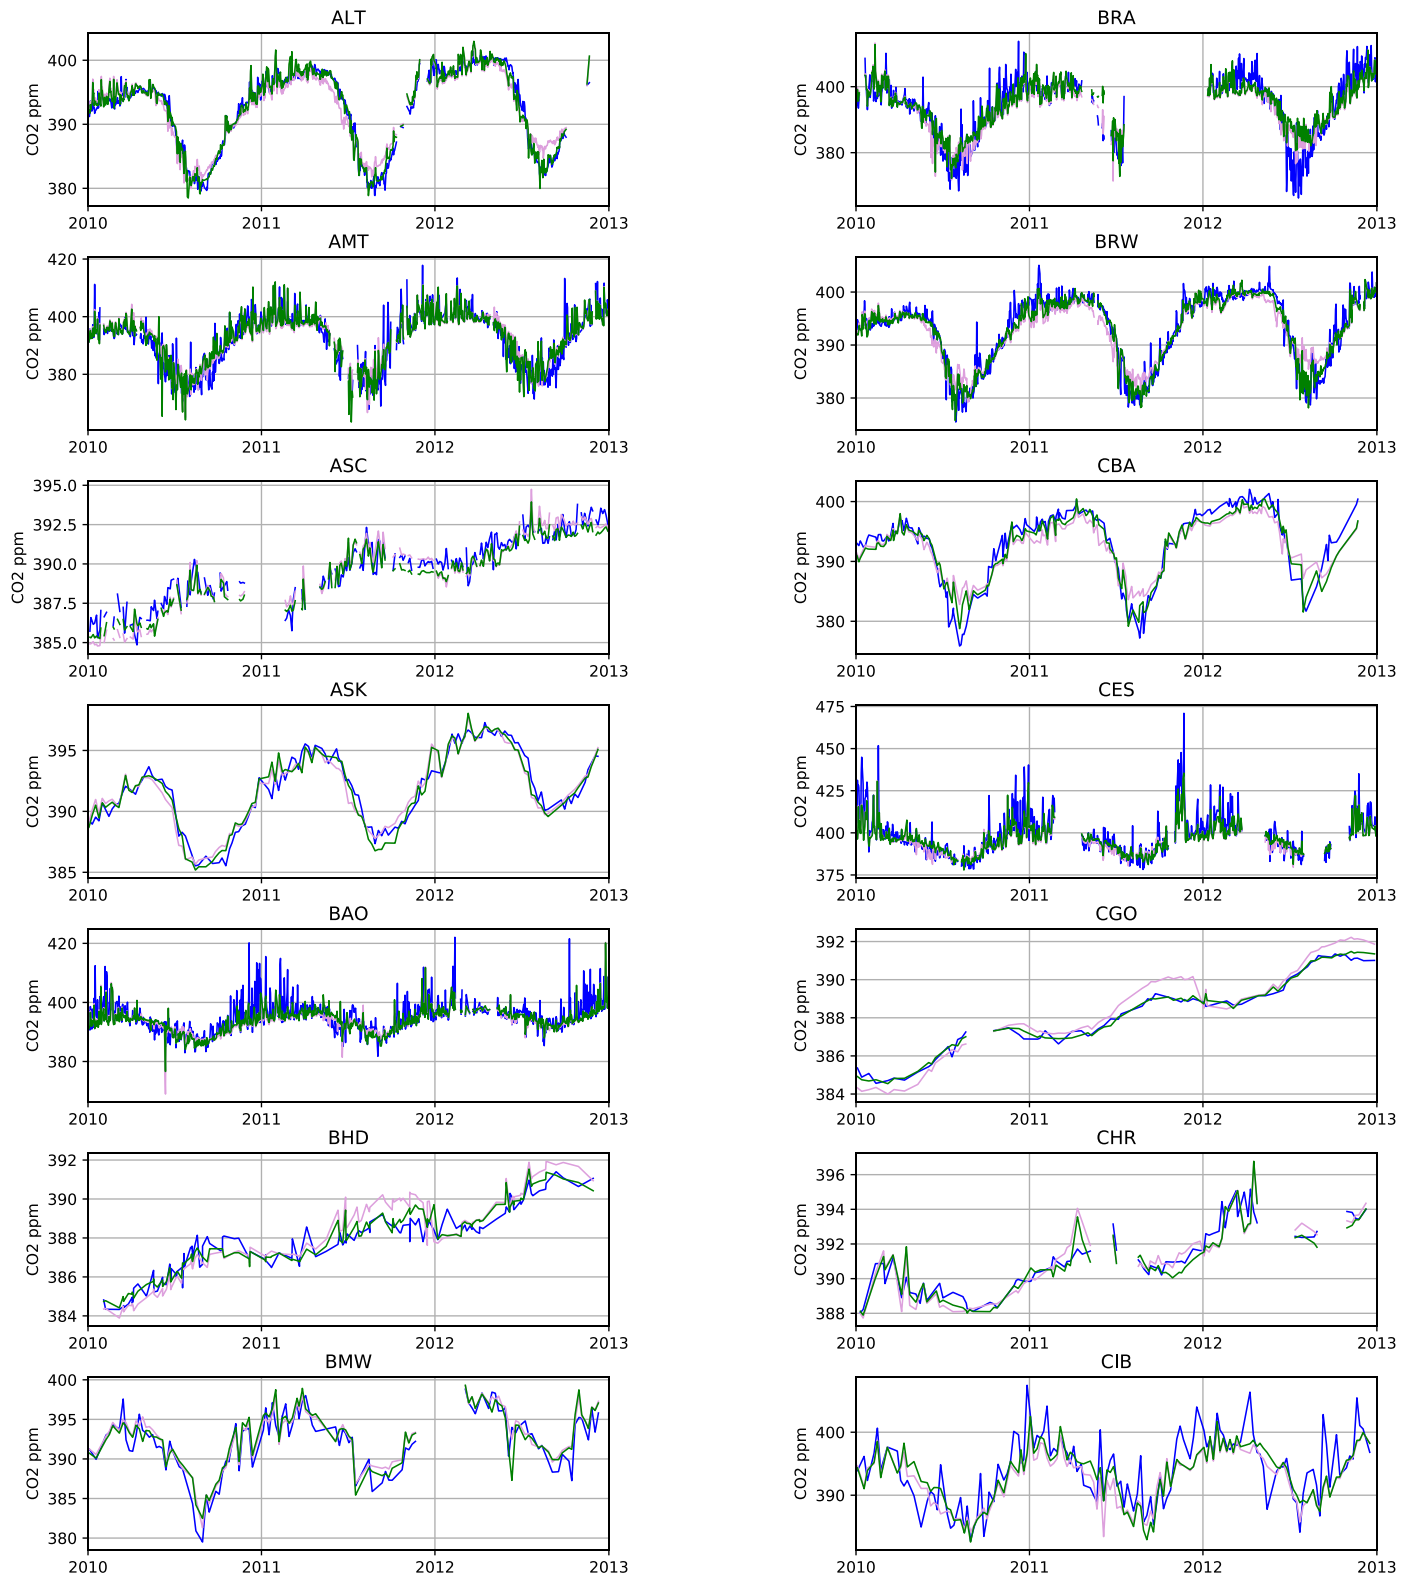

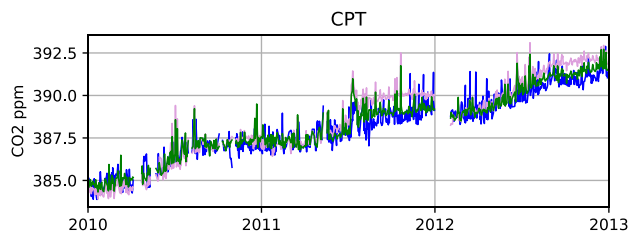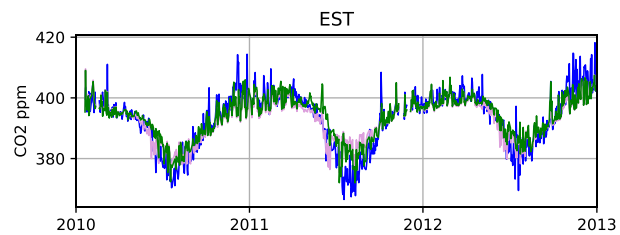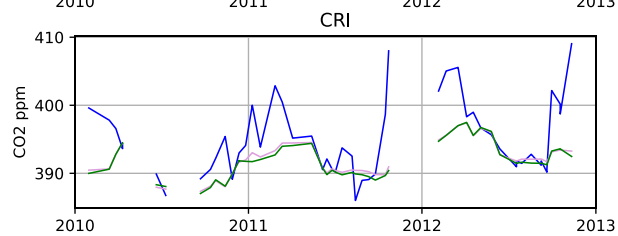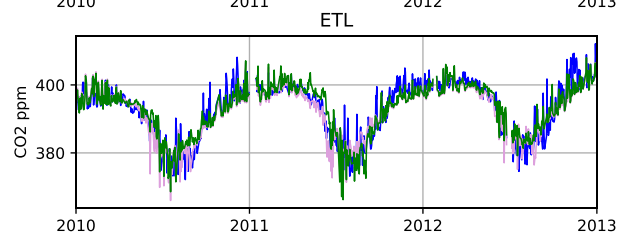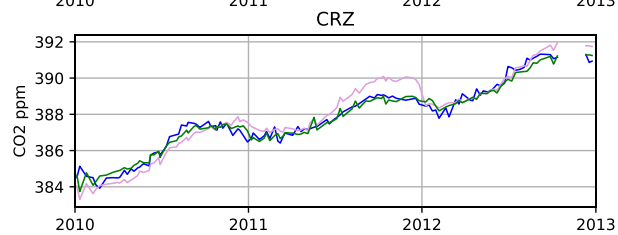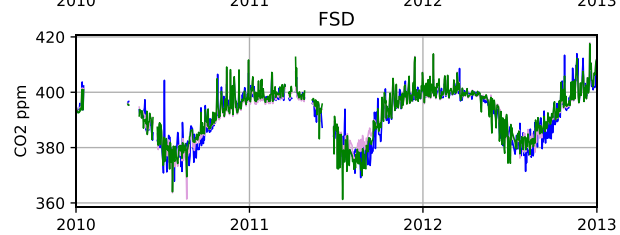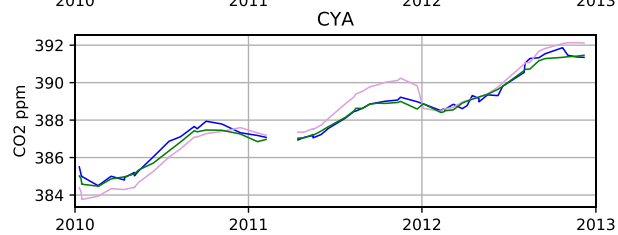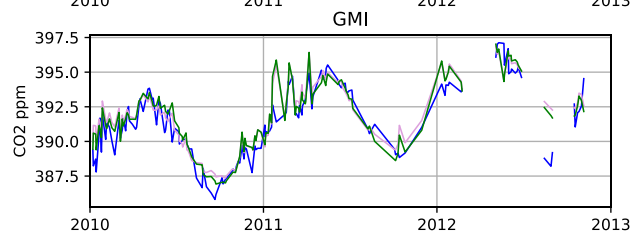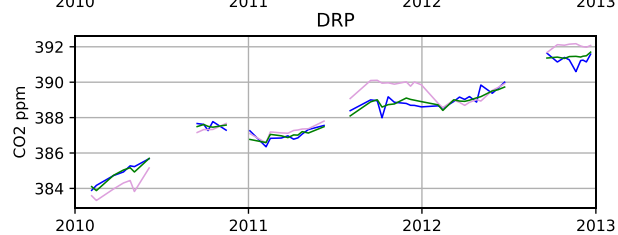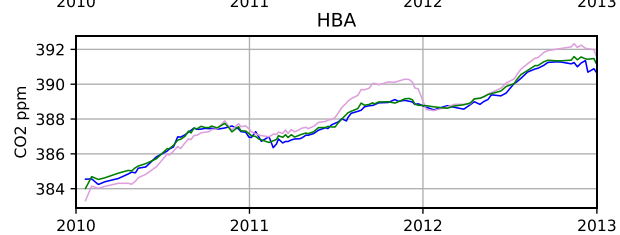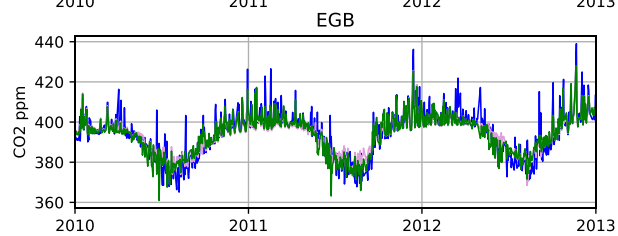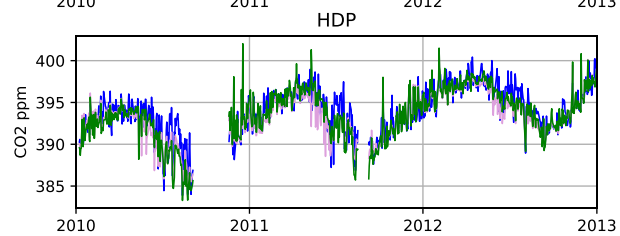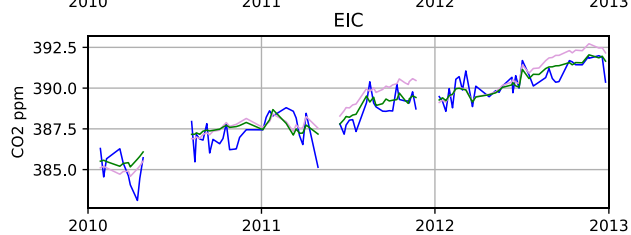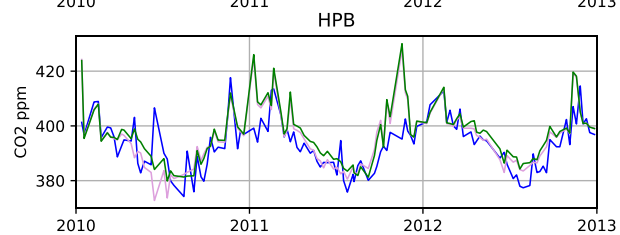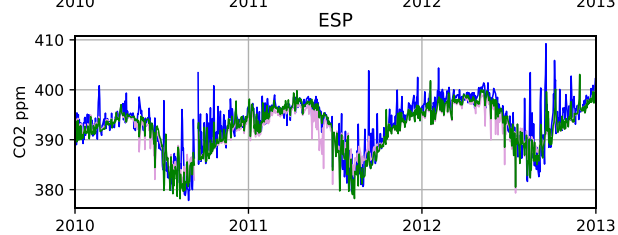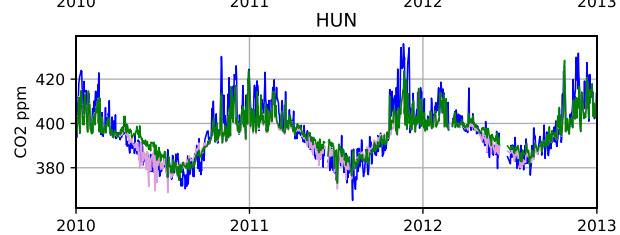

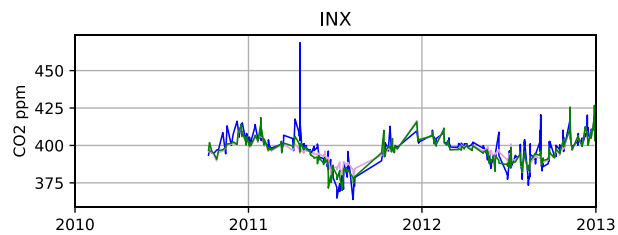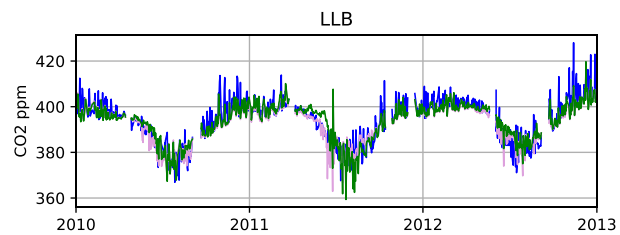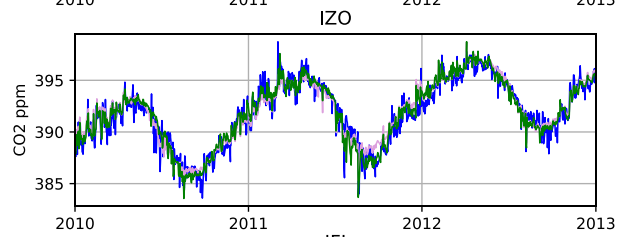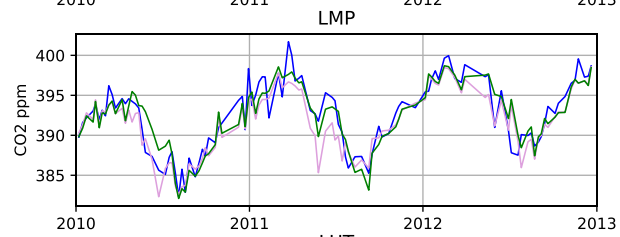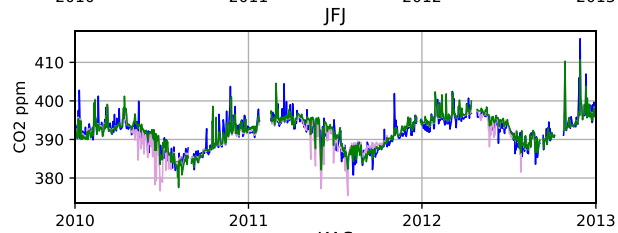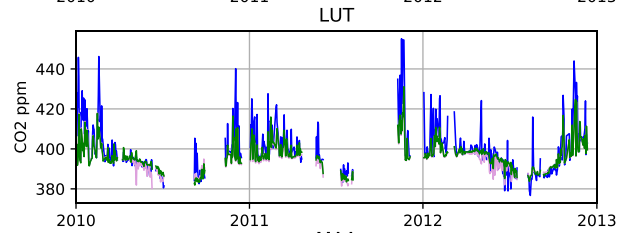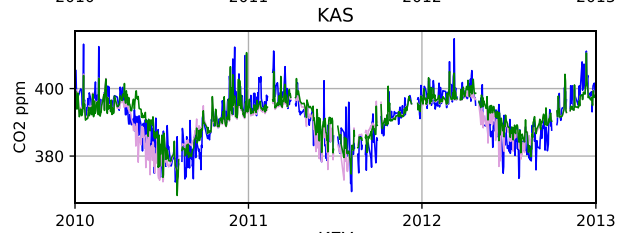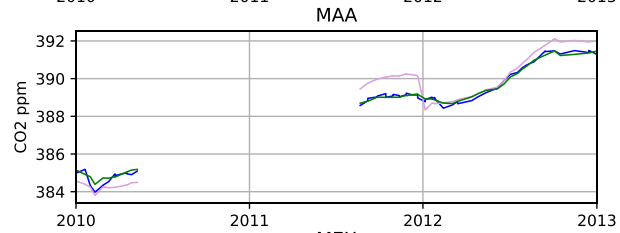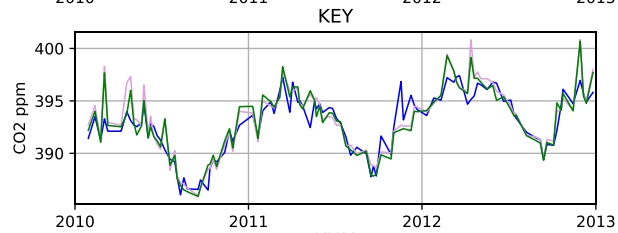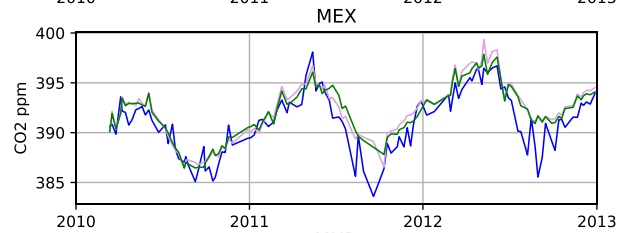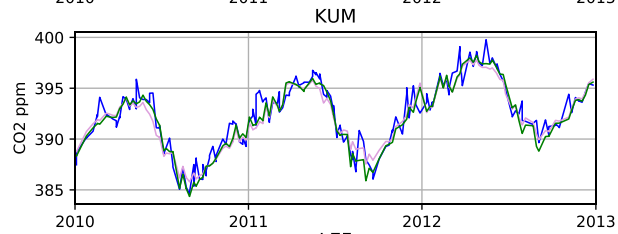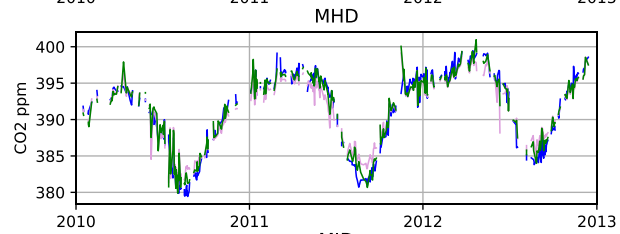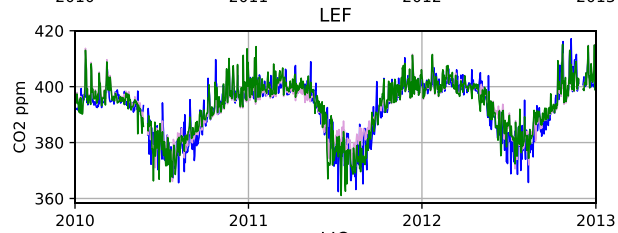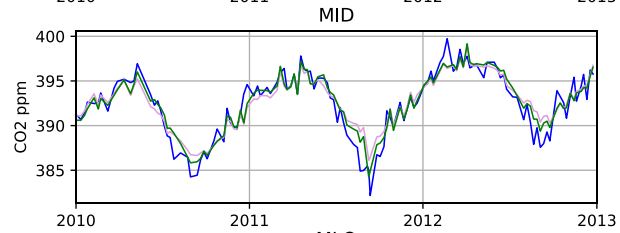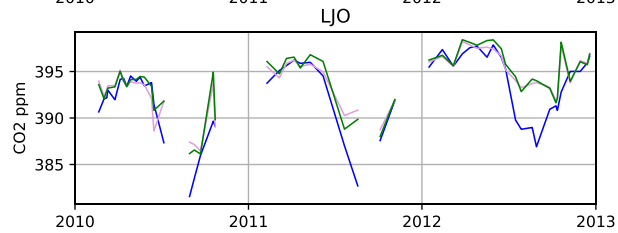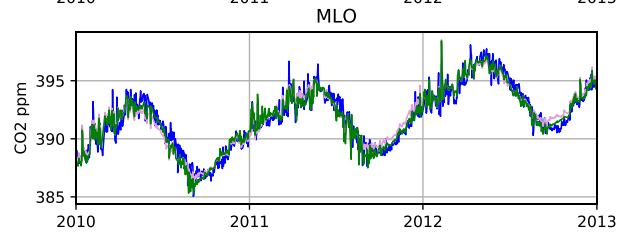

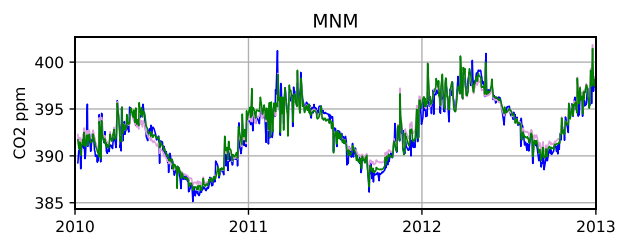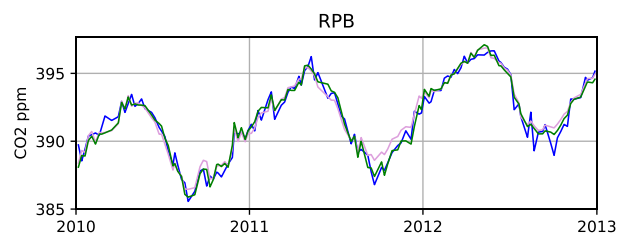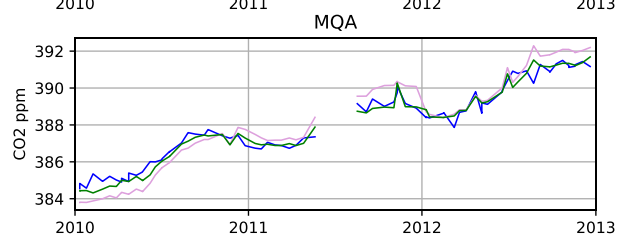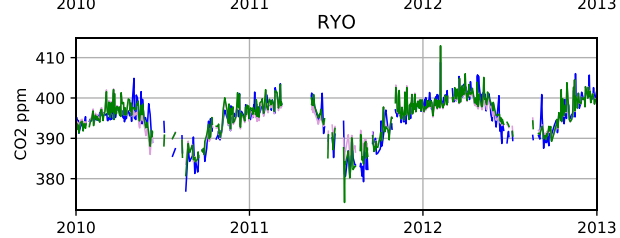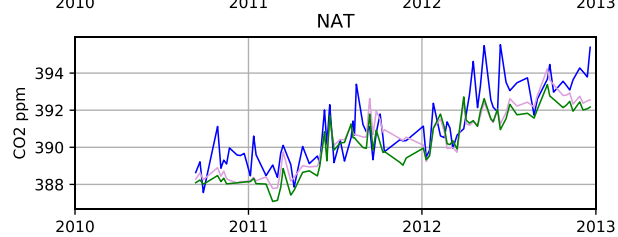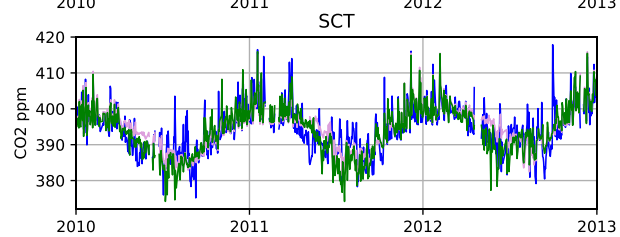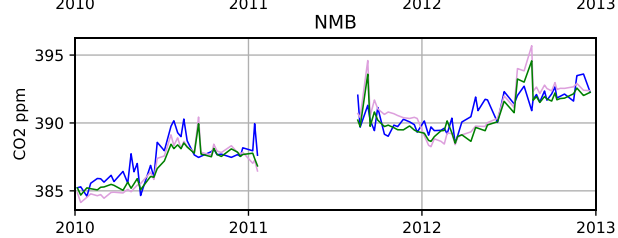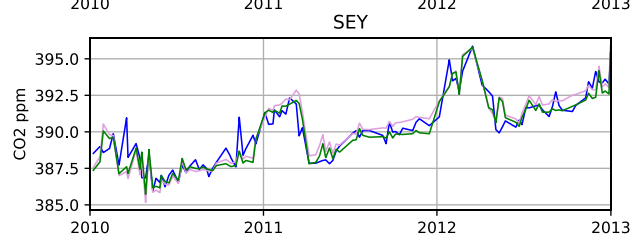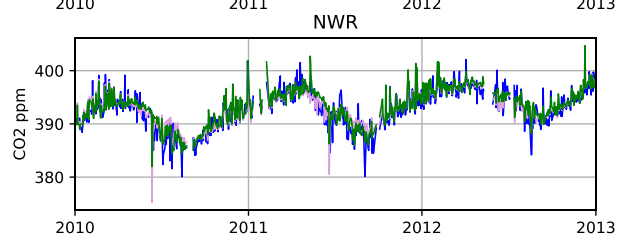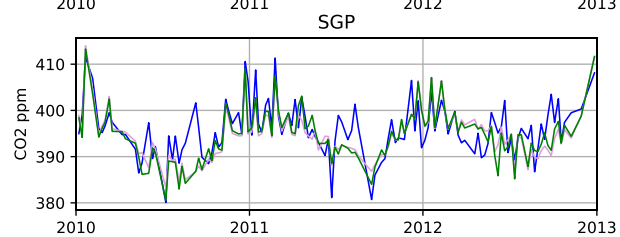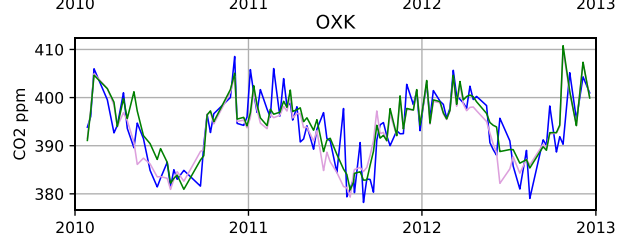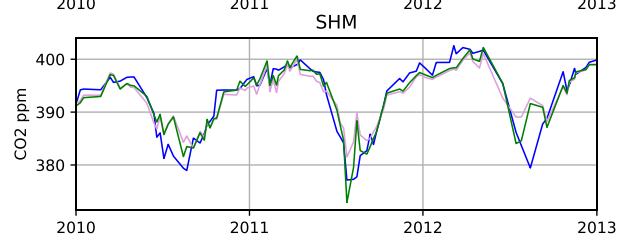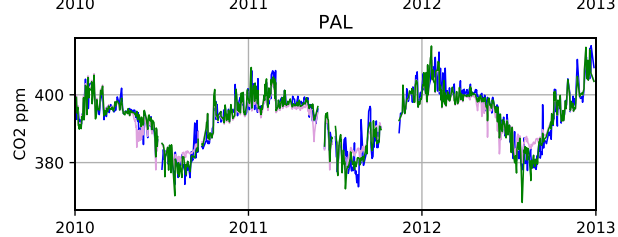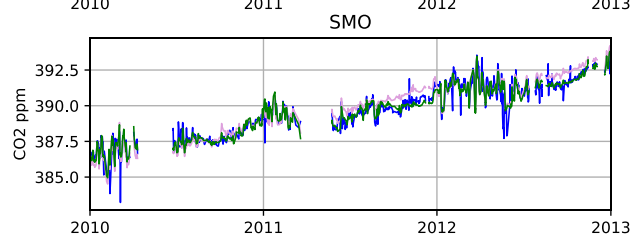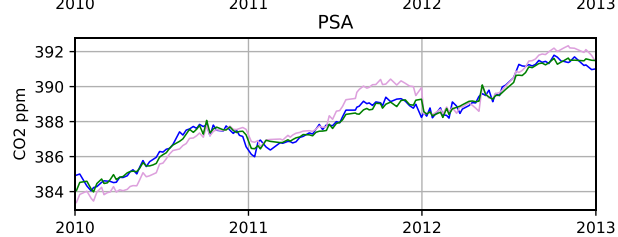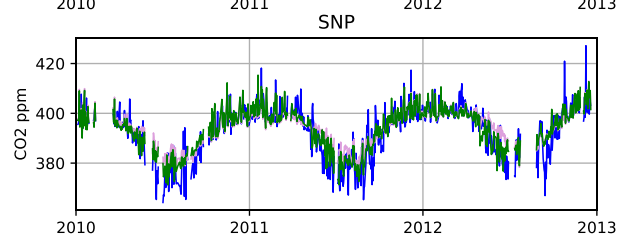

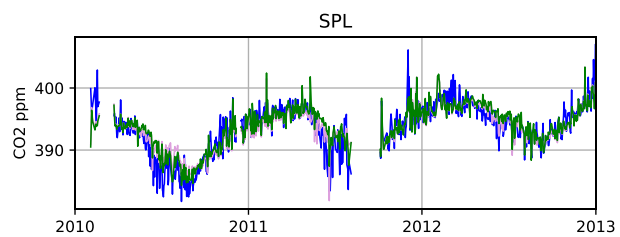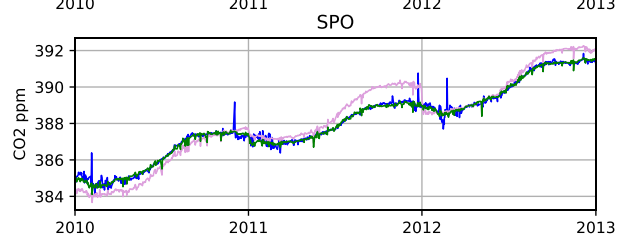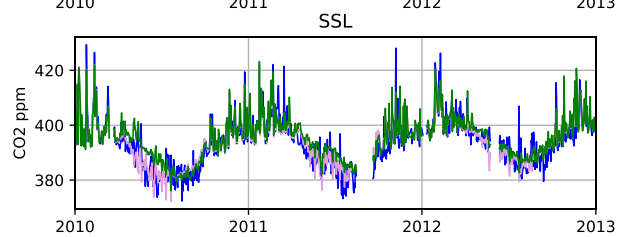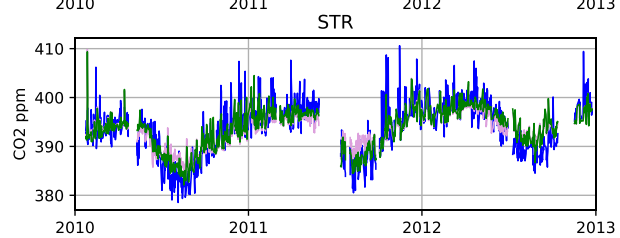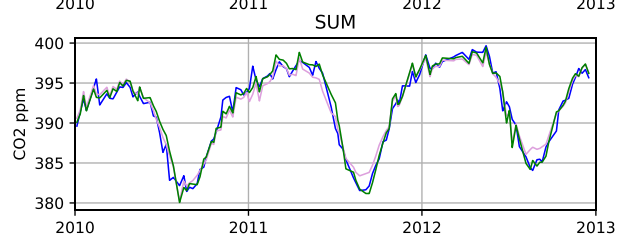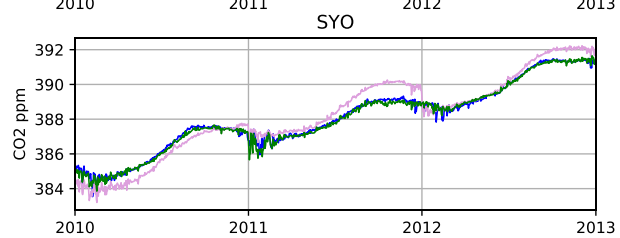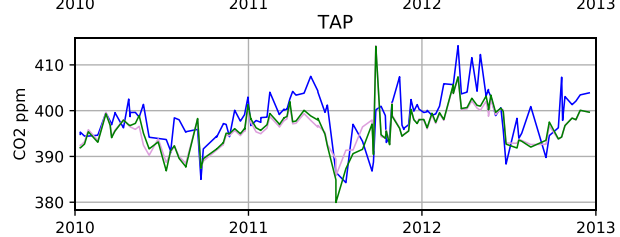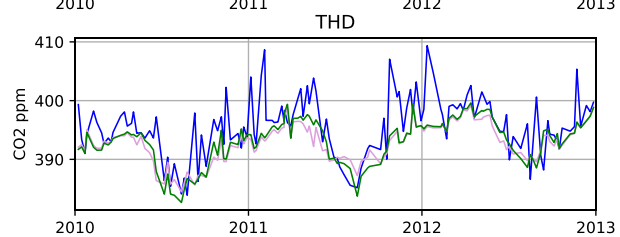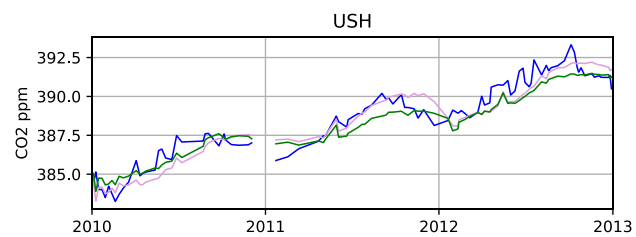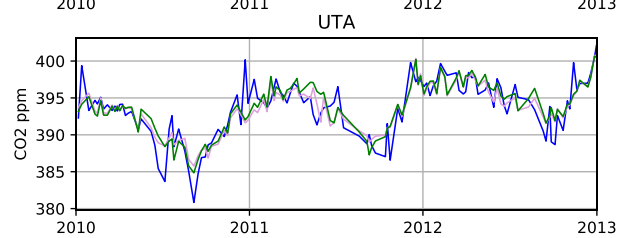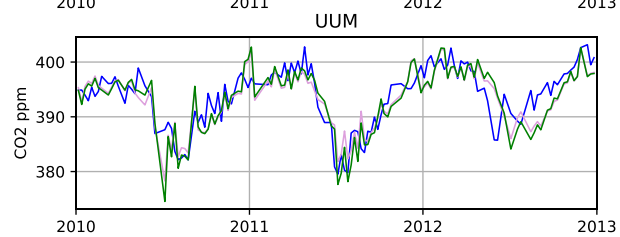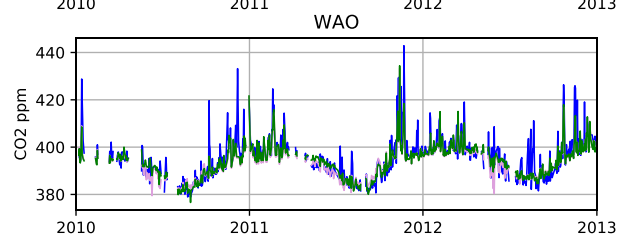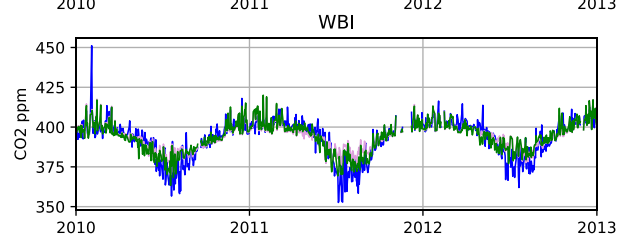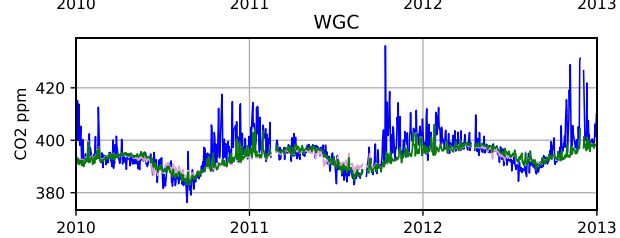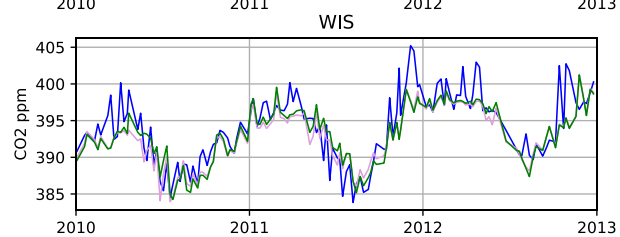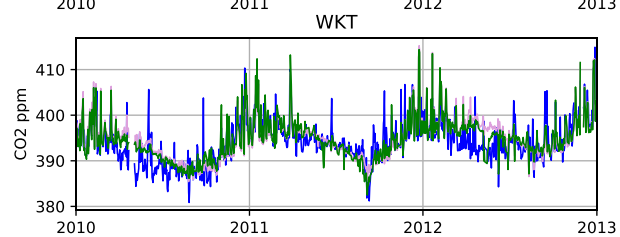

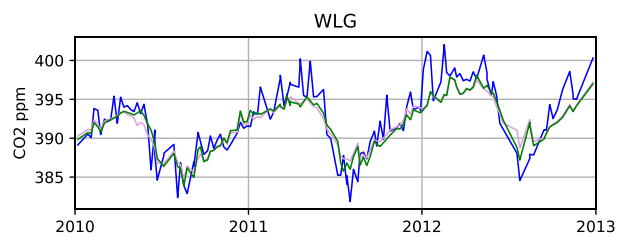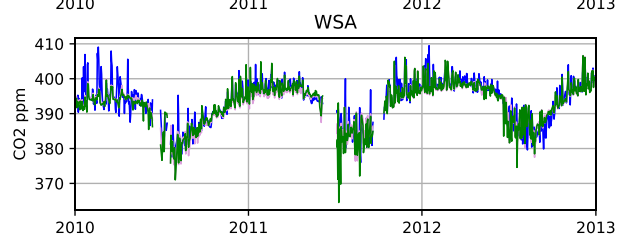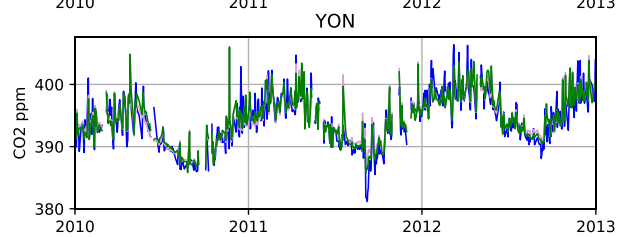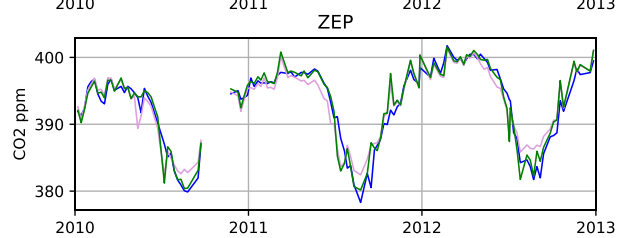

2. Time series plots for aircraft data and model simulations used in validation (blue – observed, plum – forward, green – optimized)

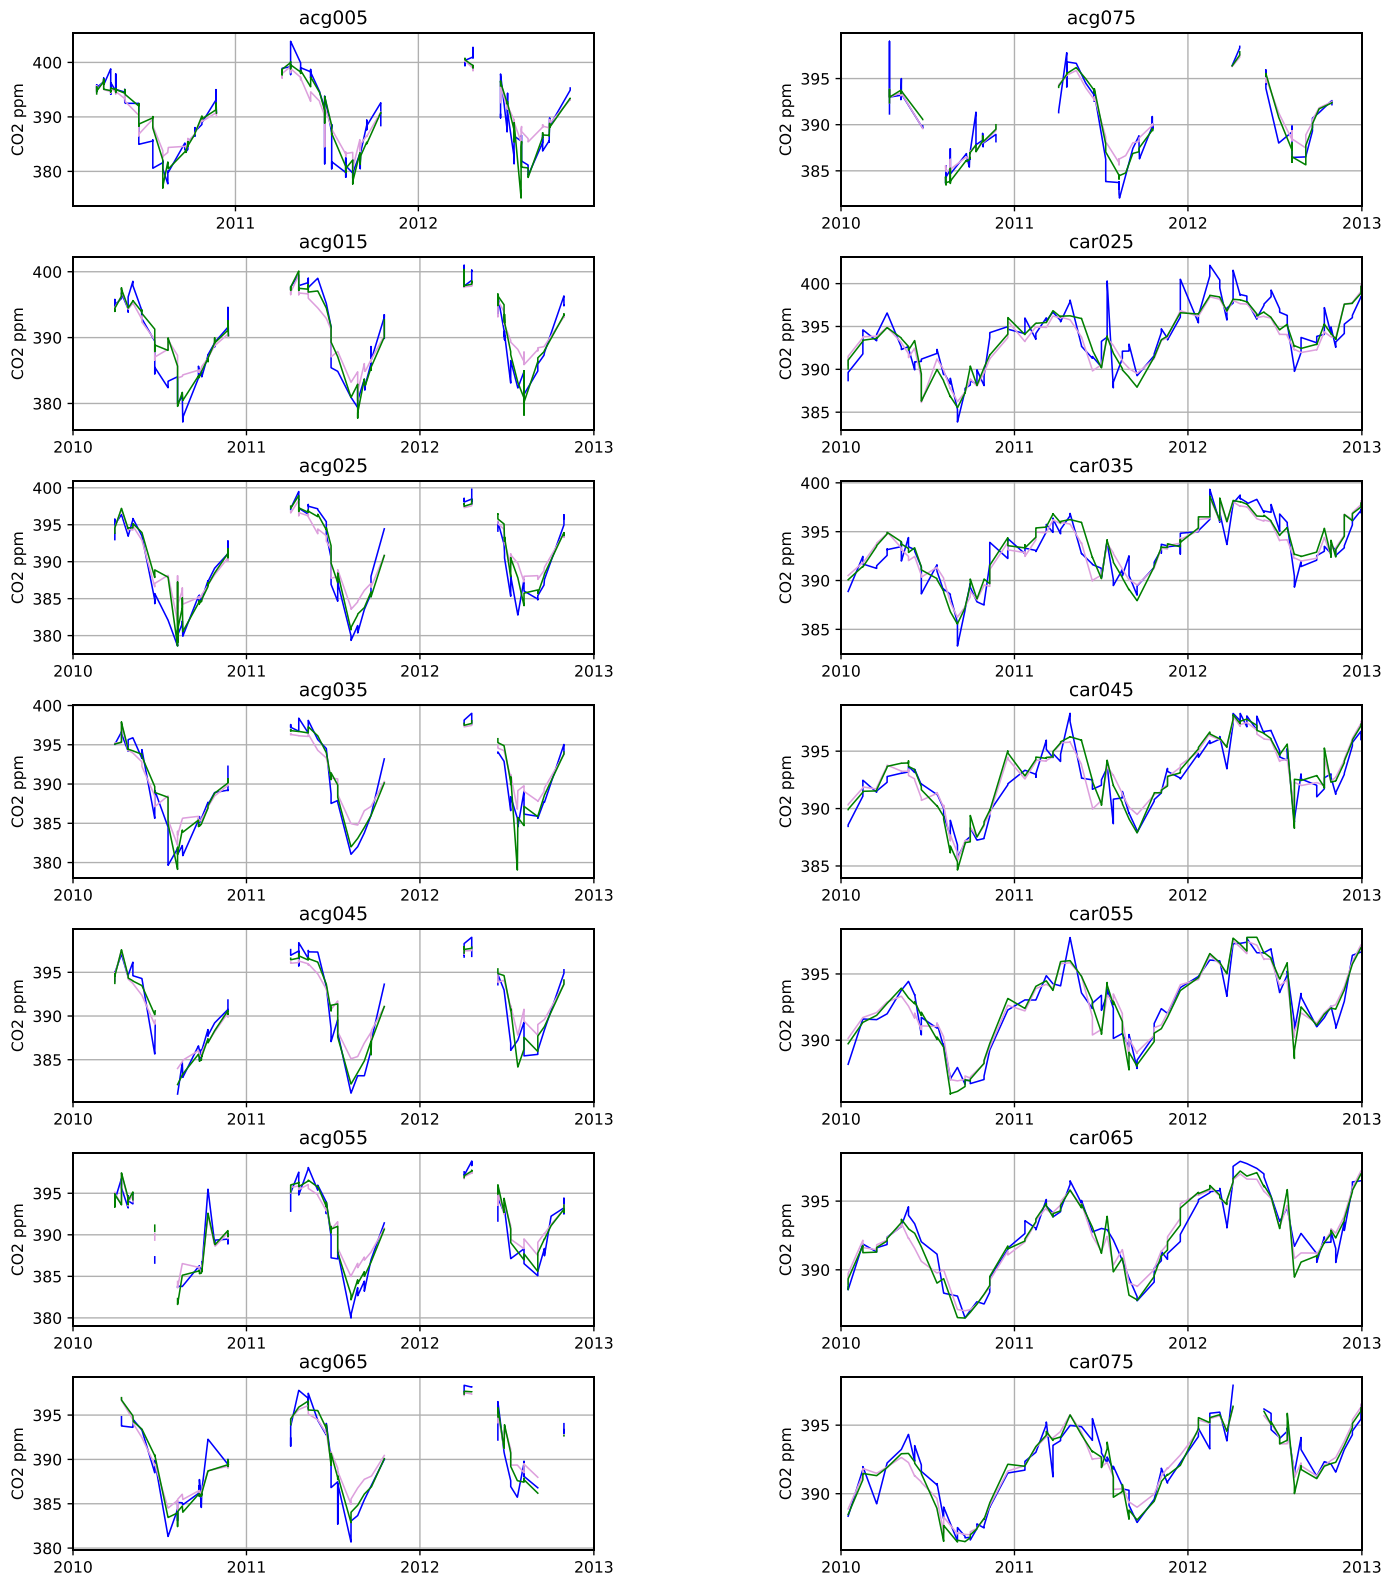

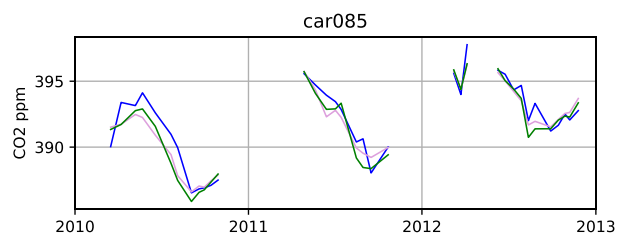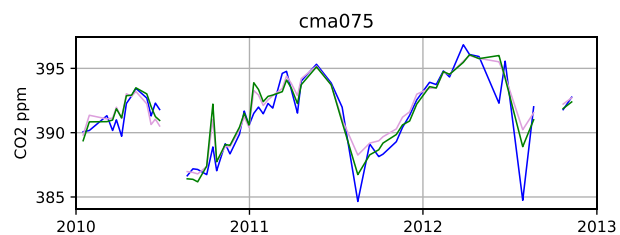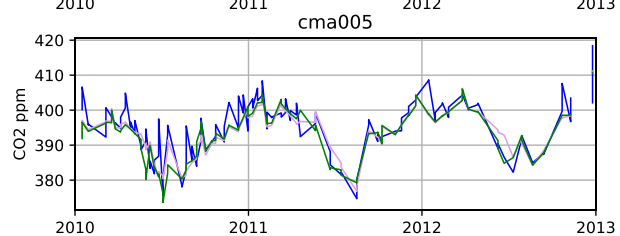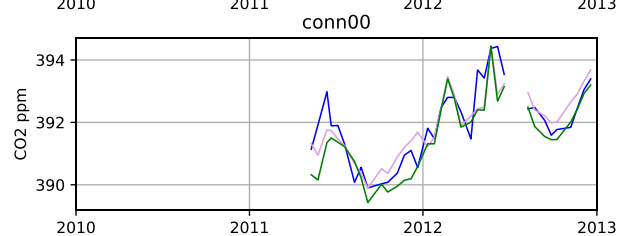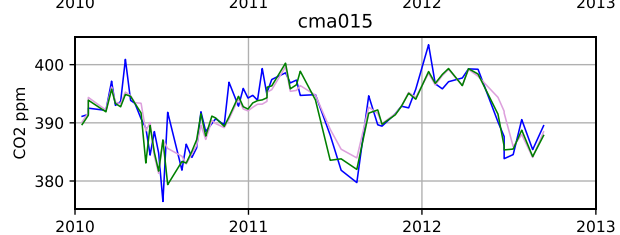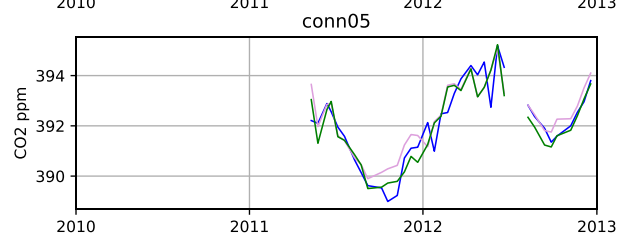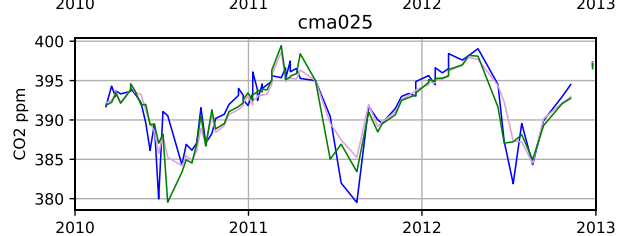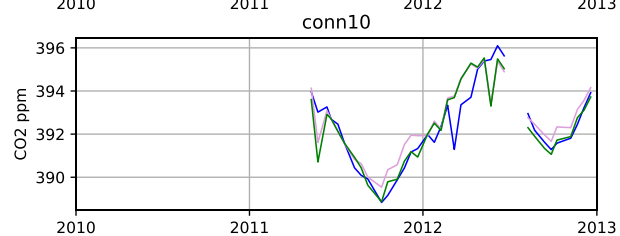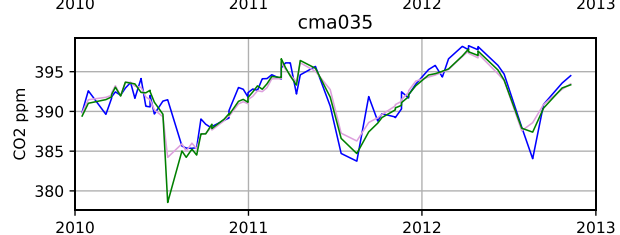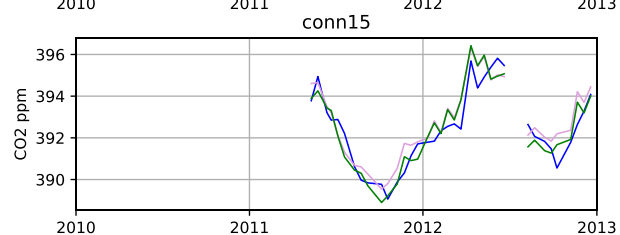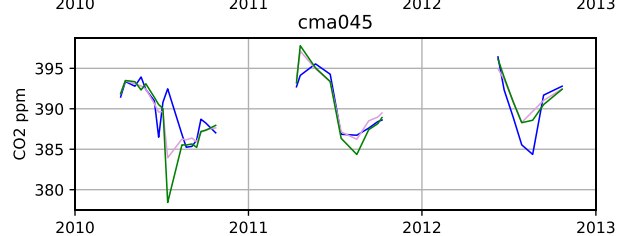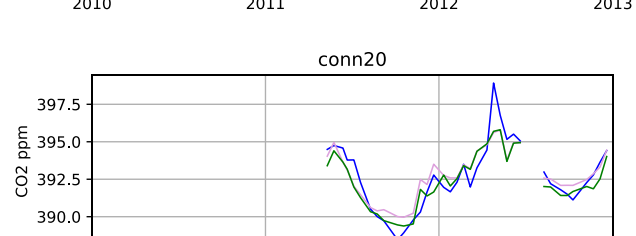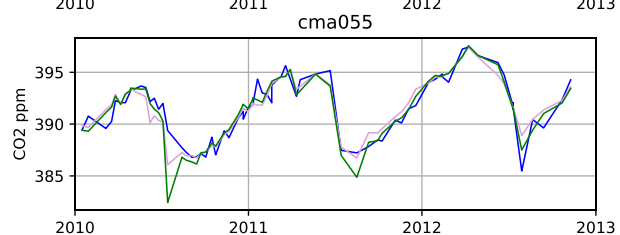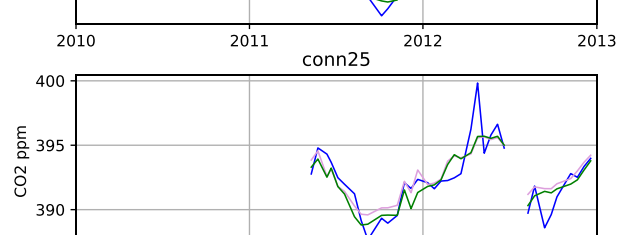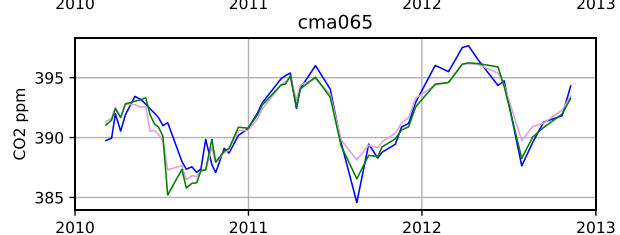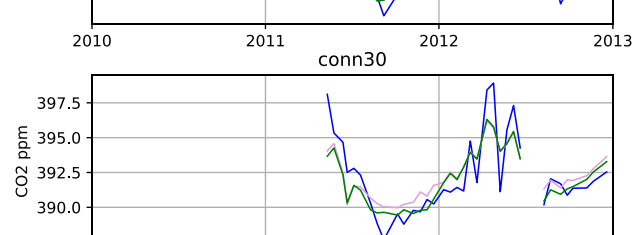



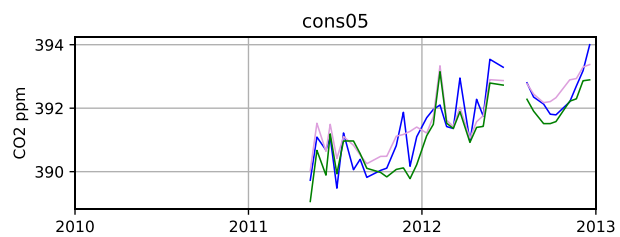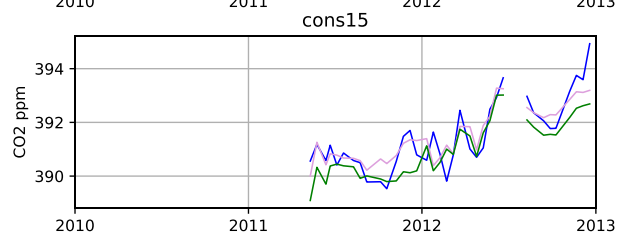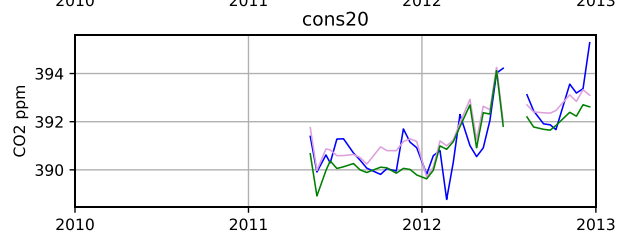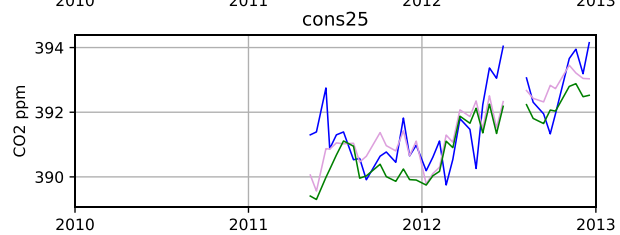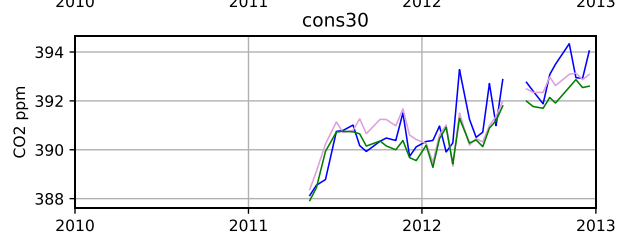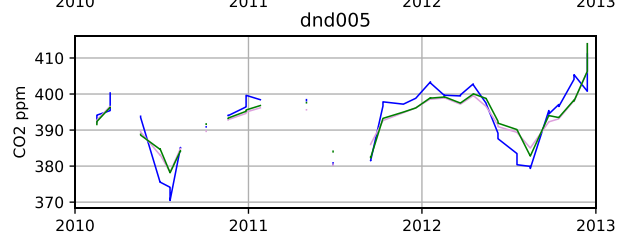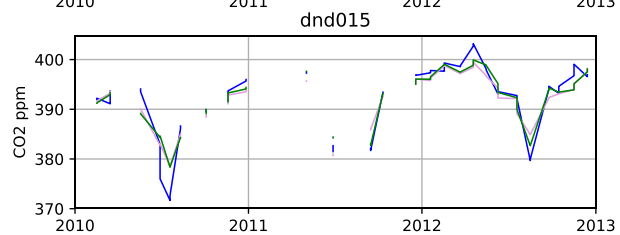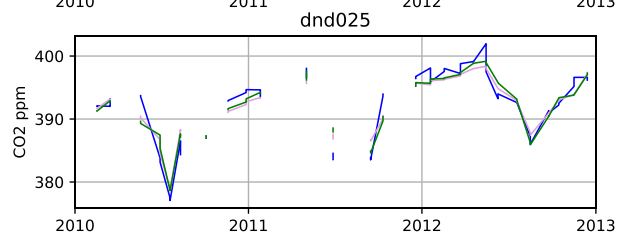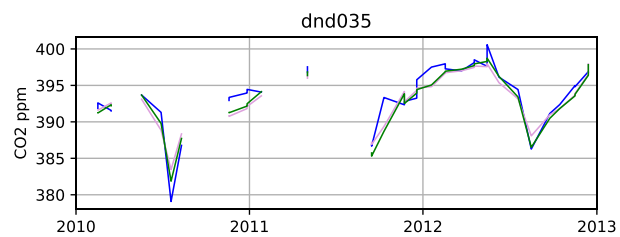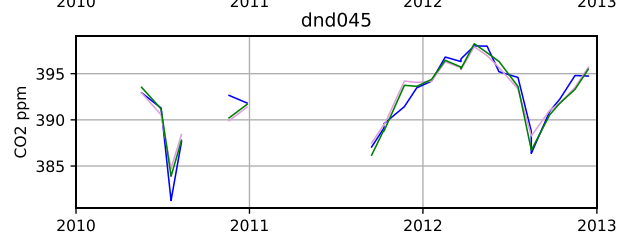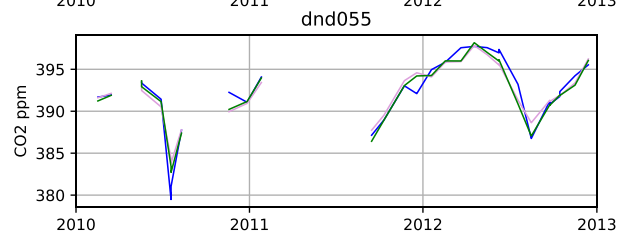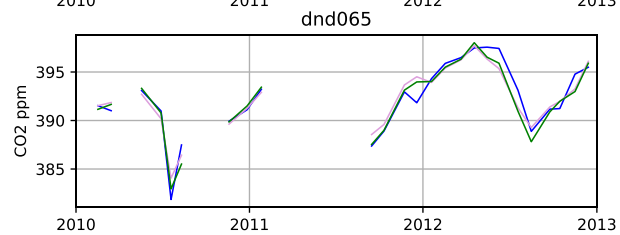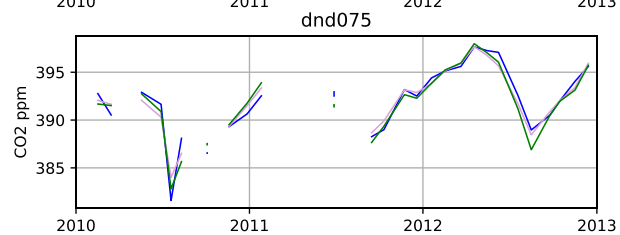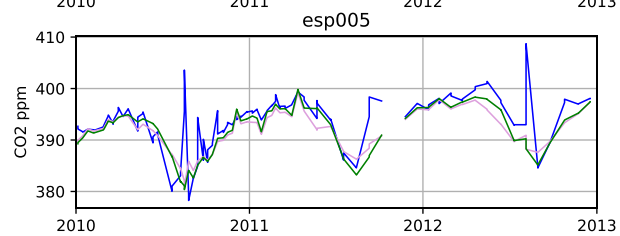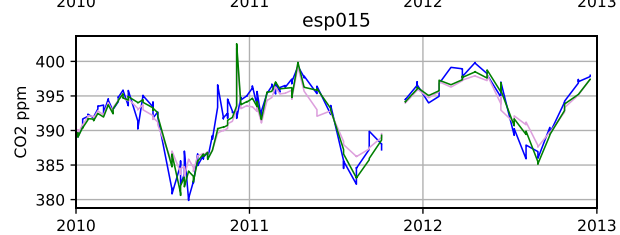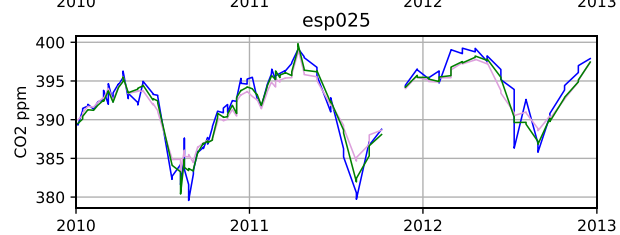

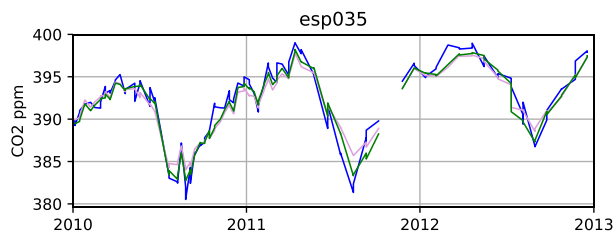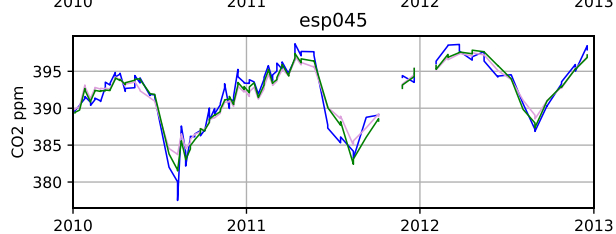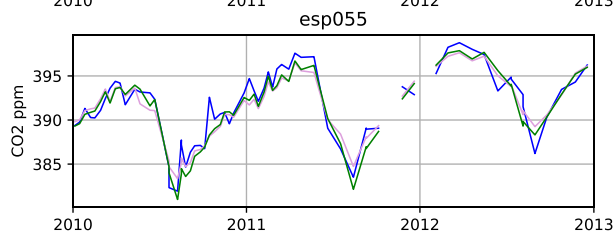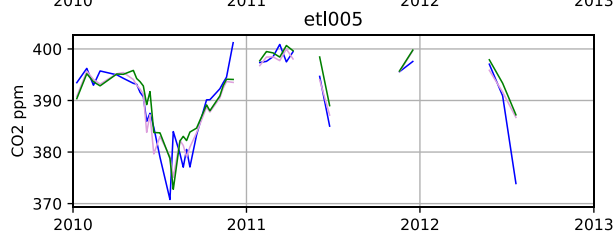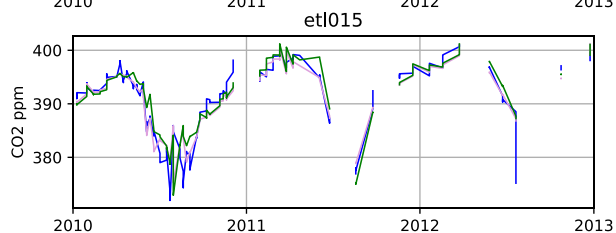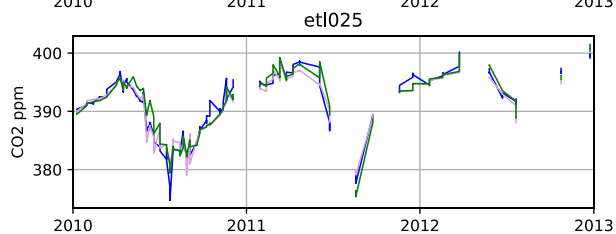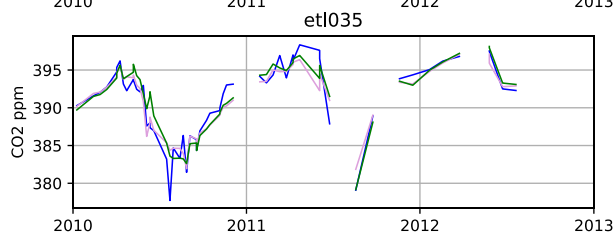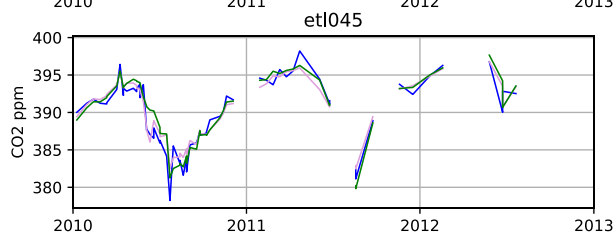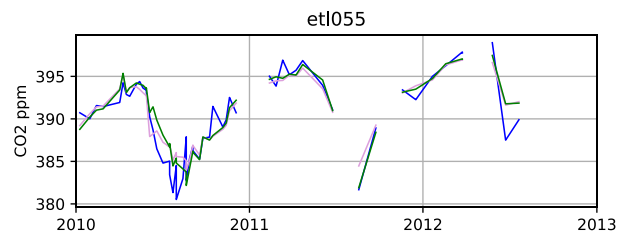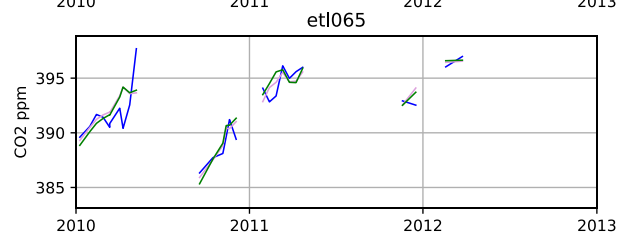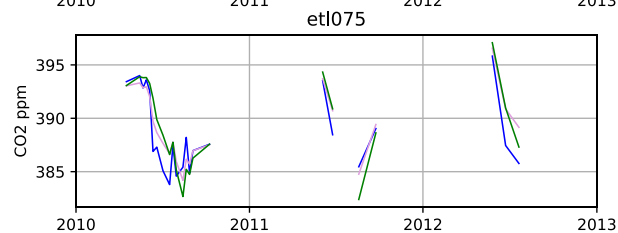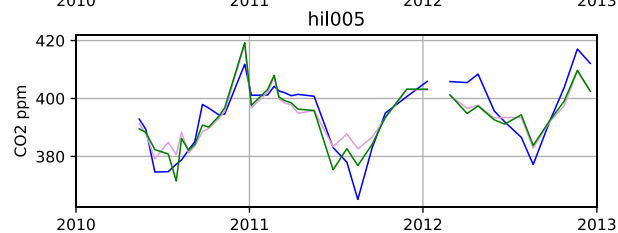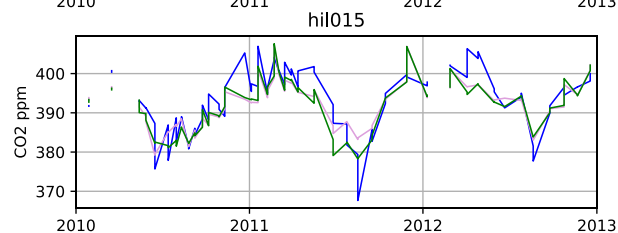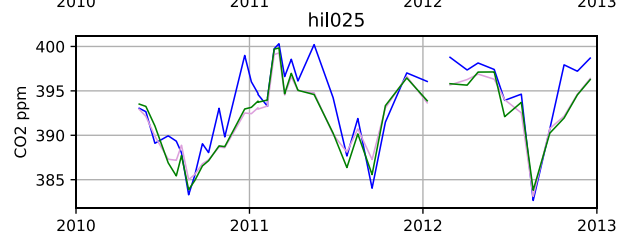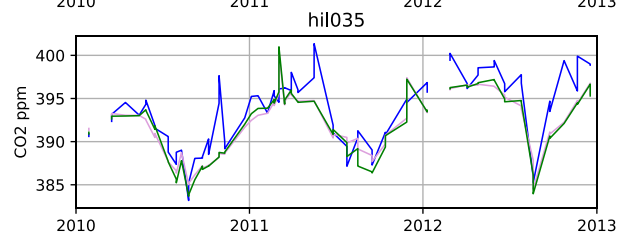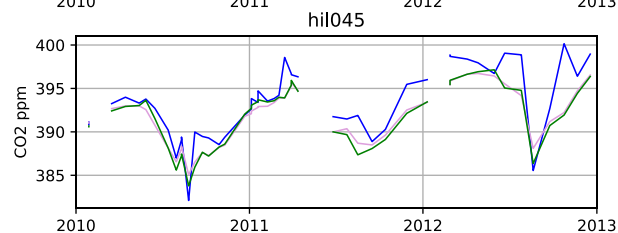

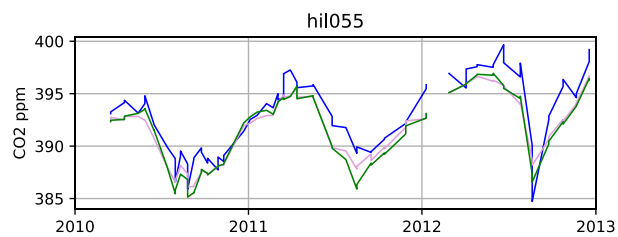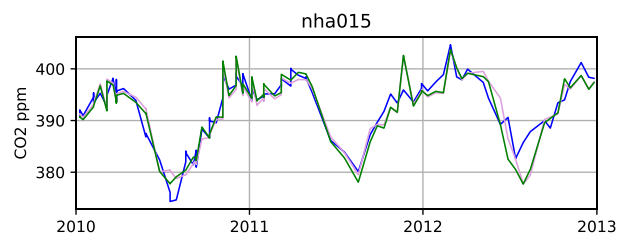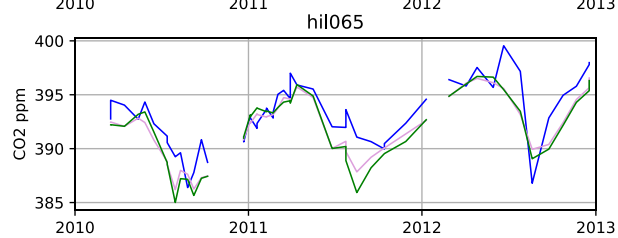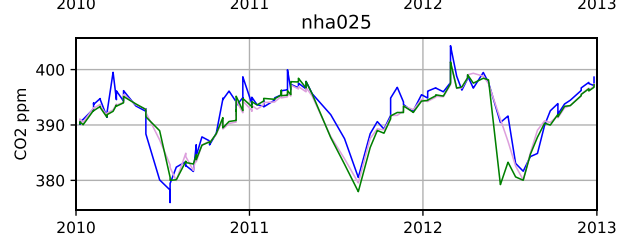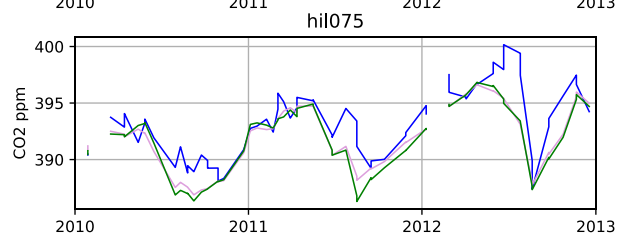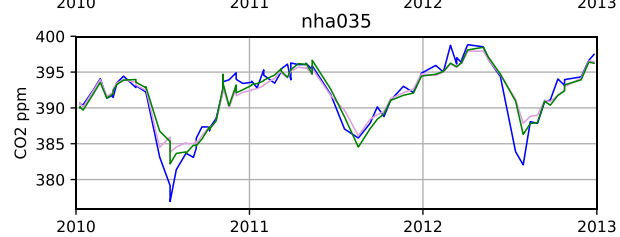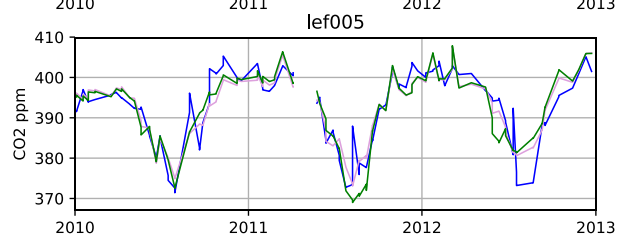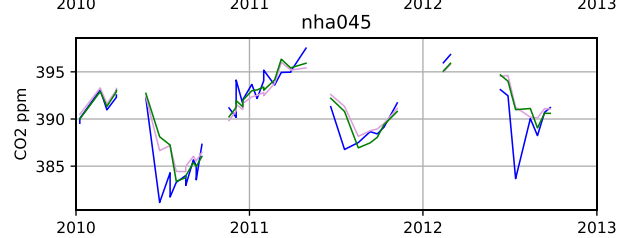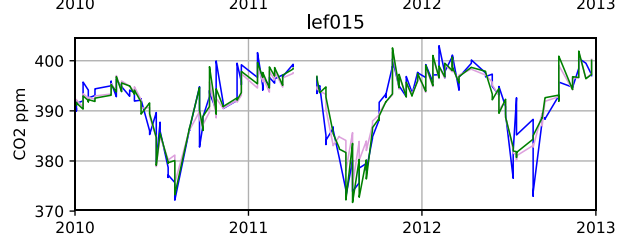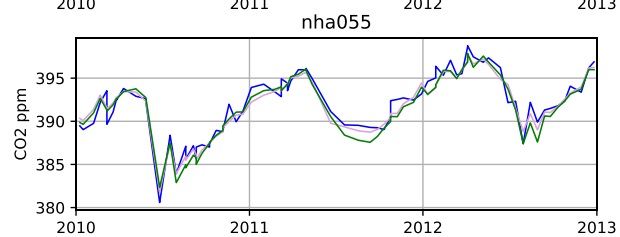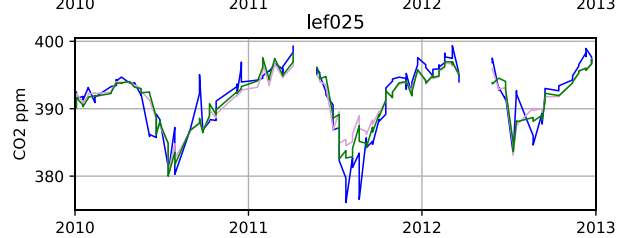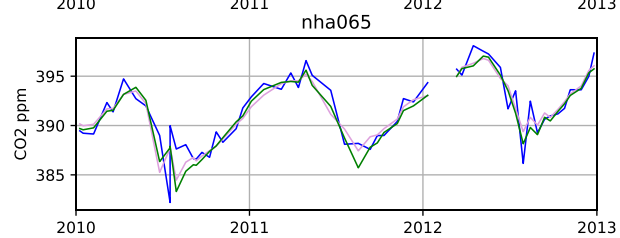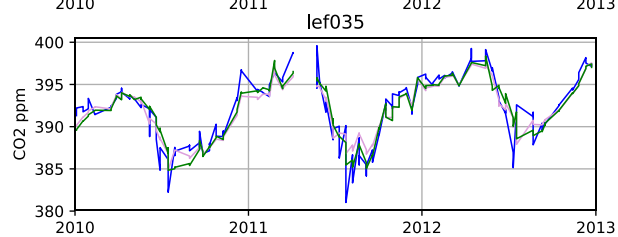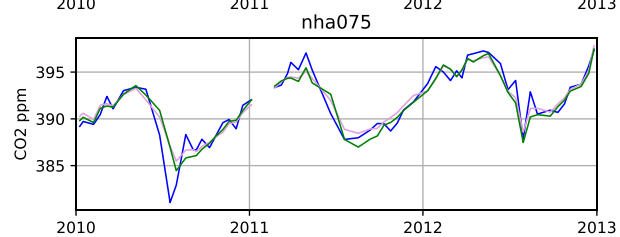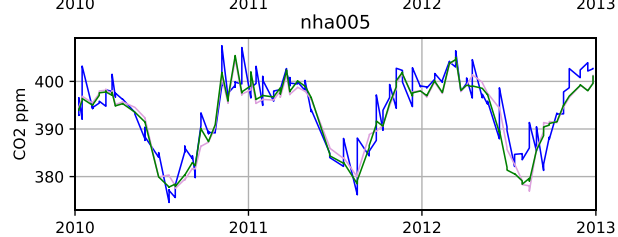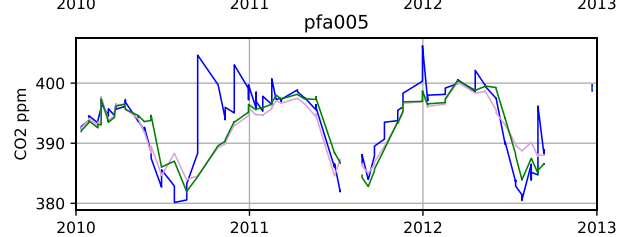

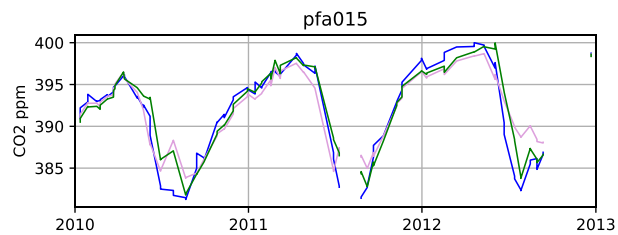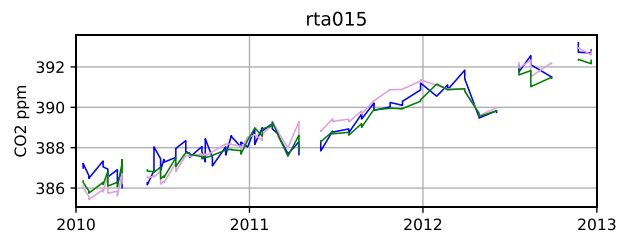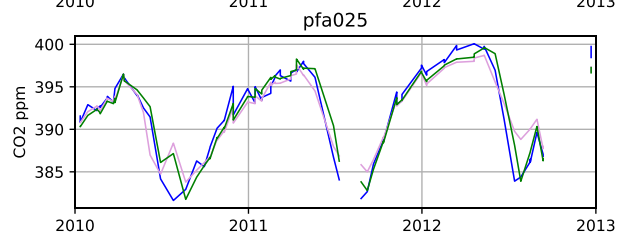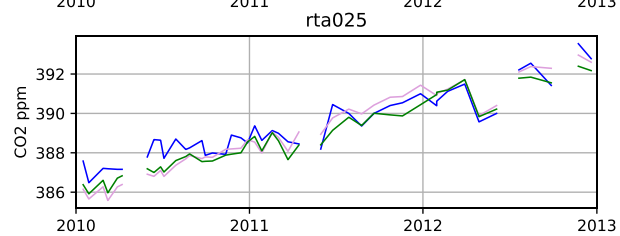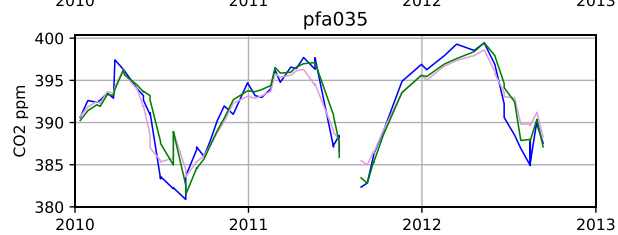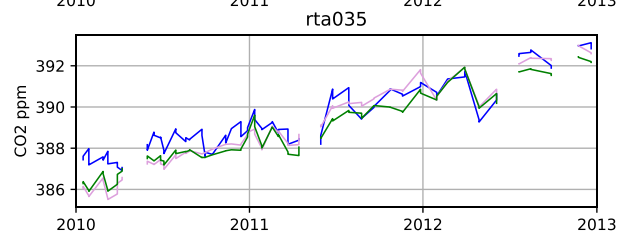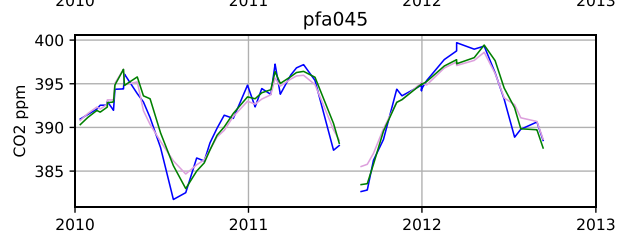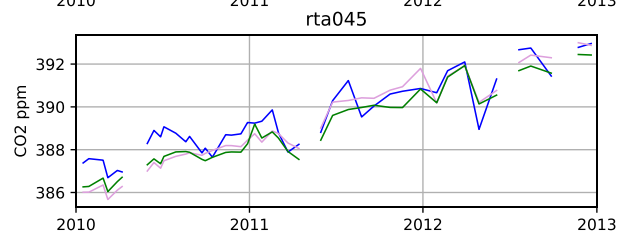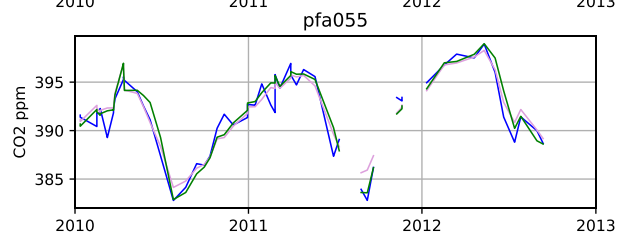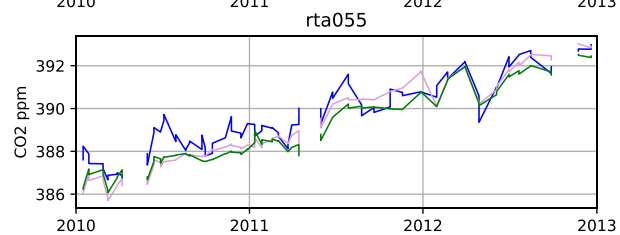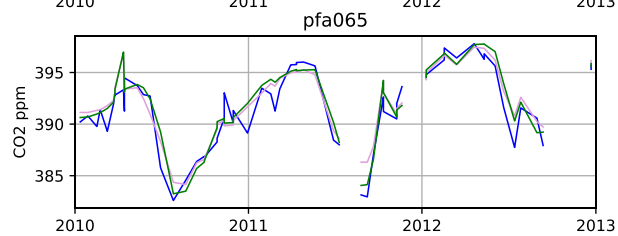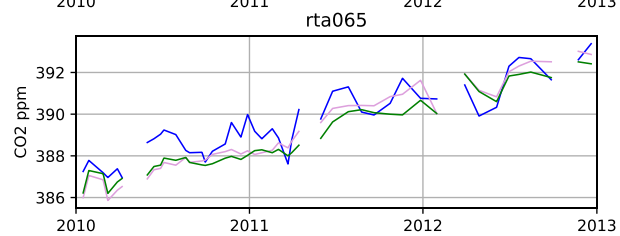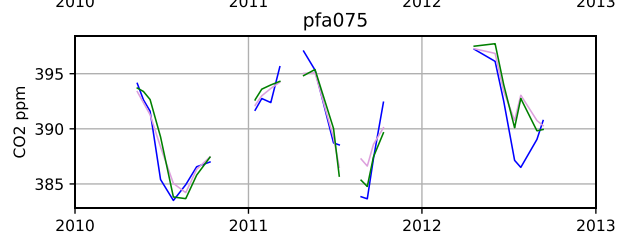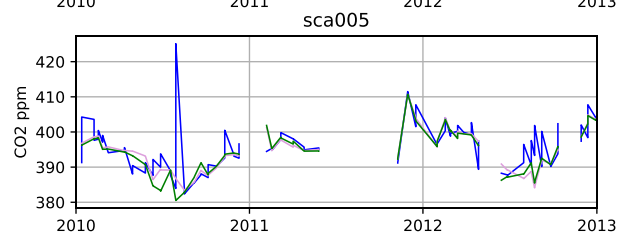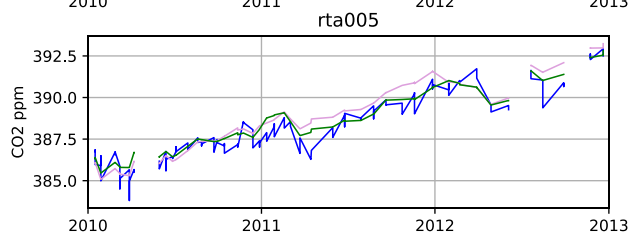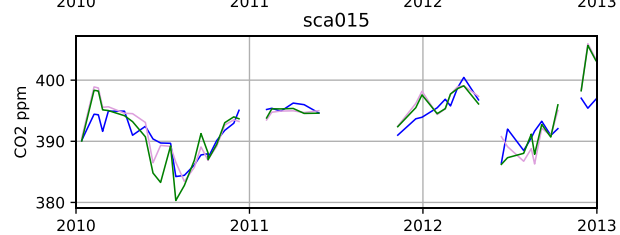

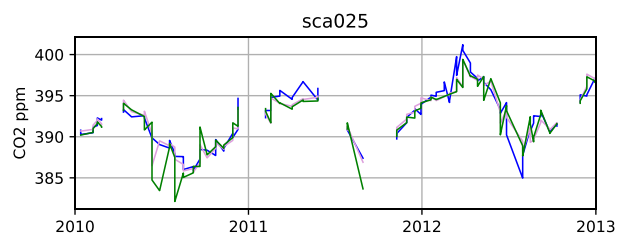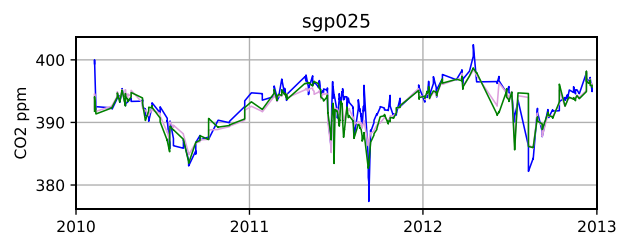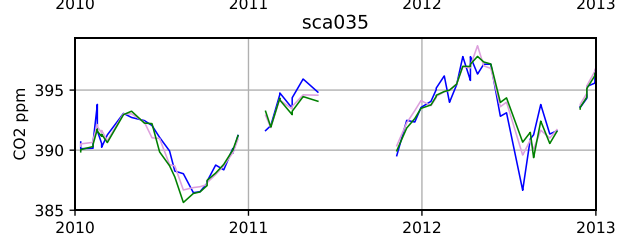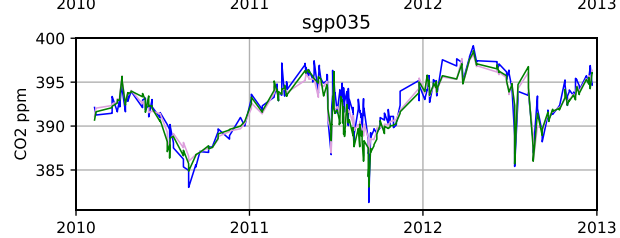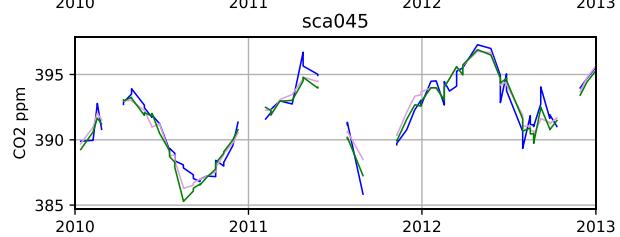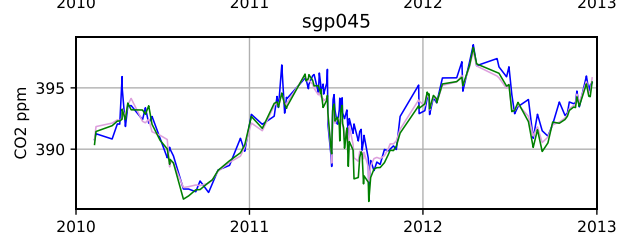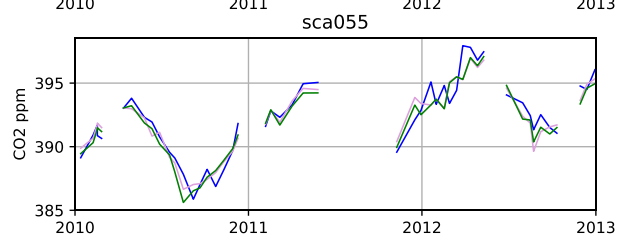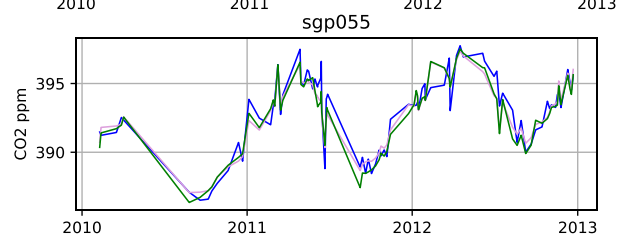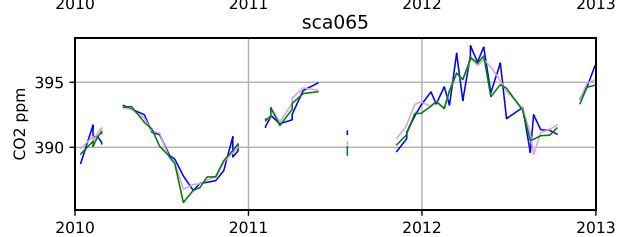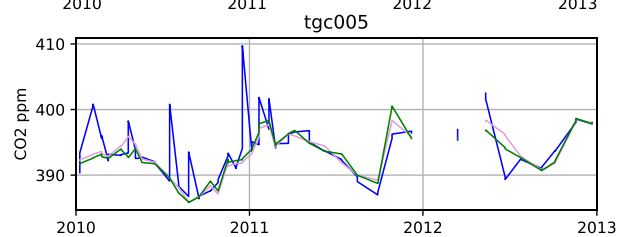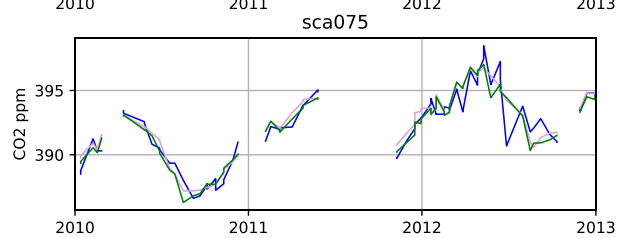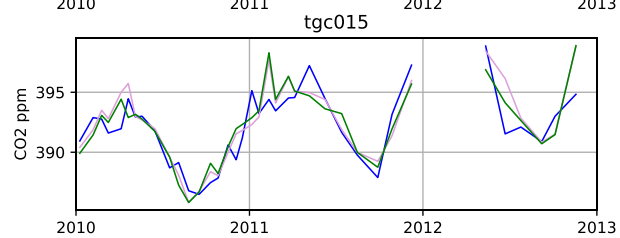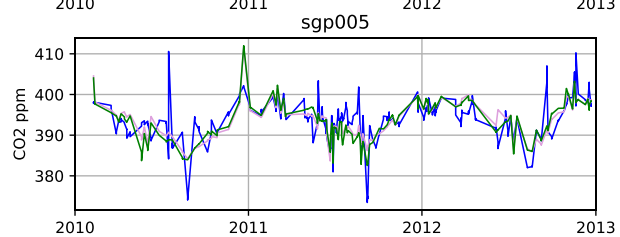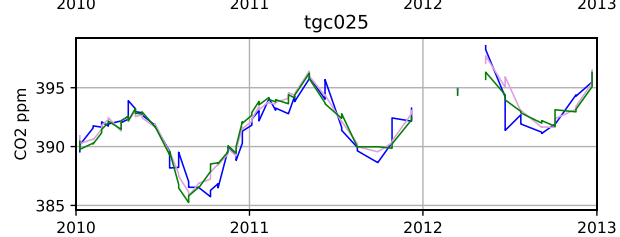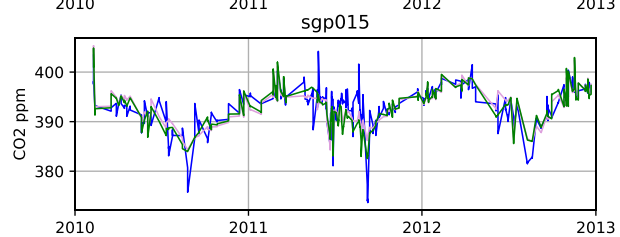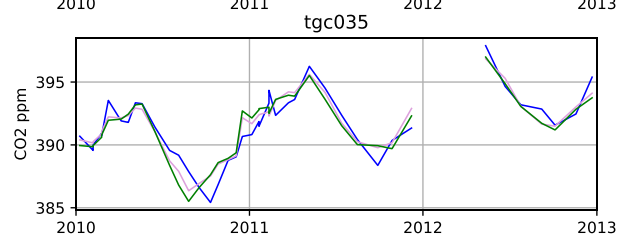

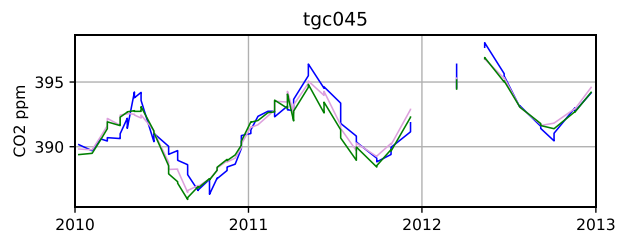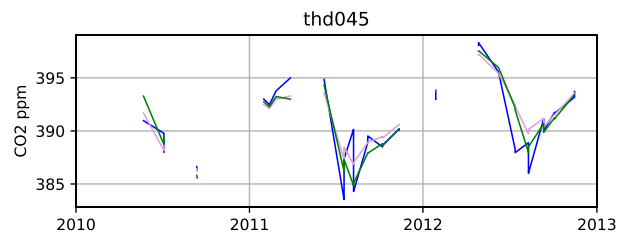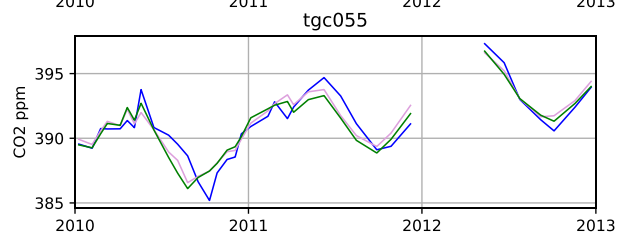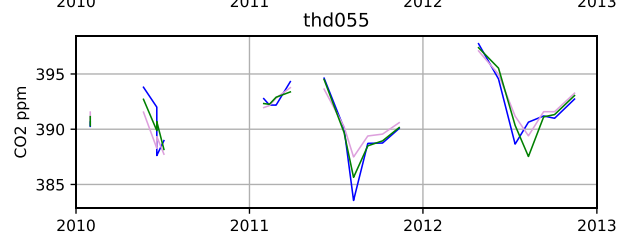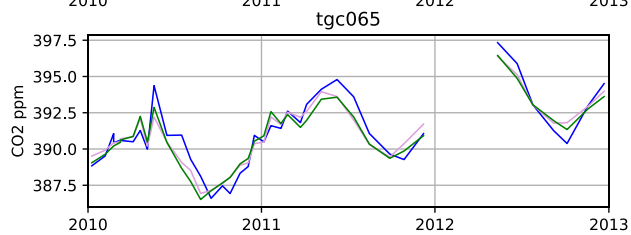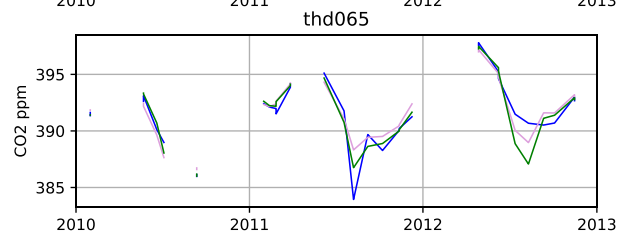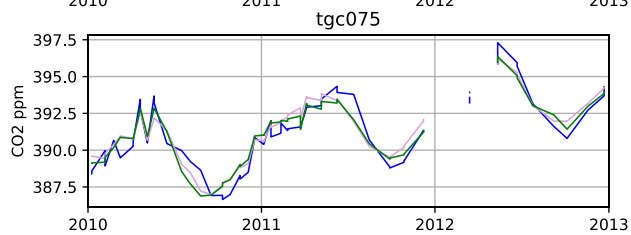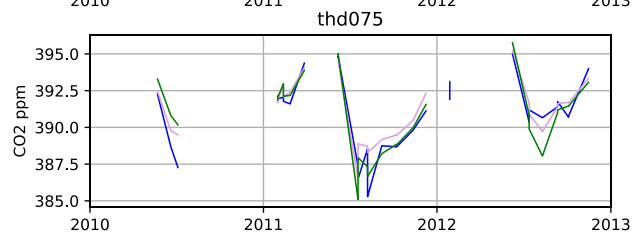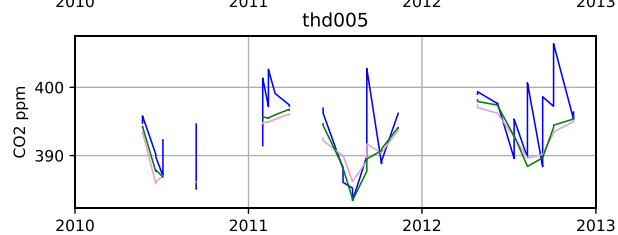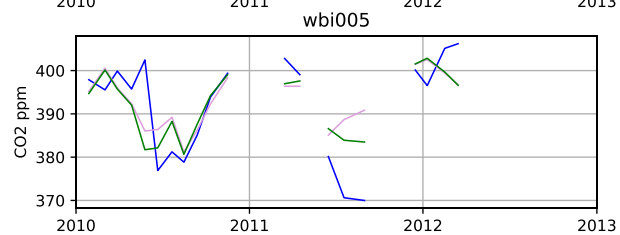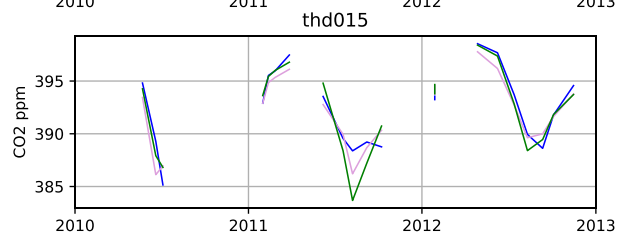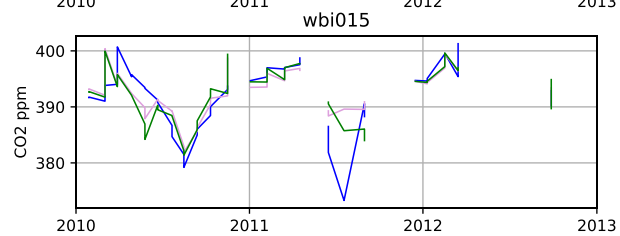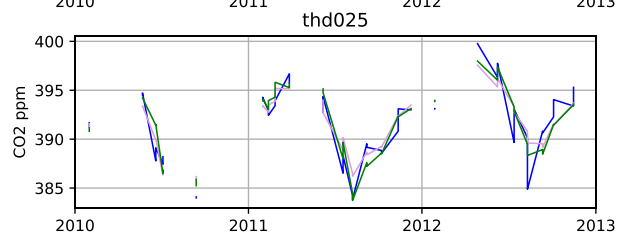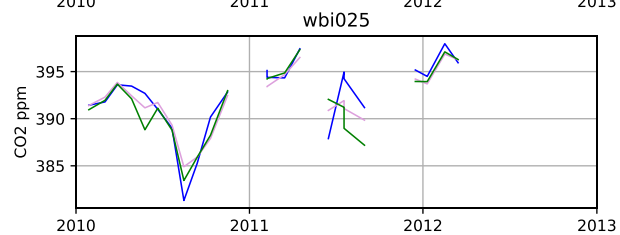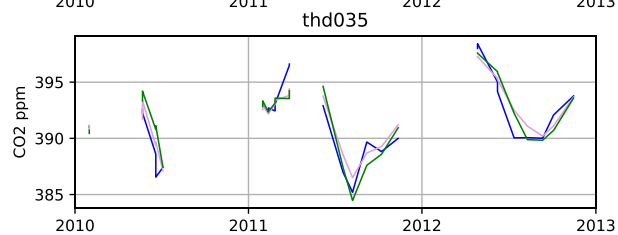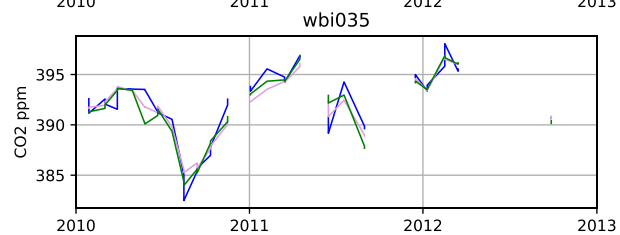

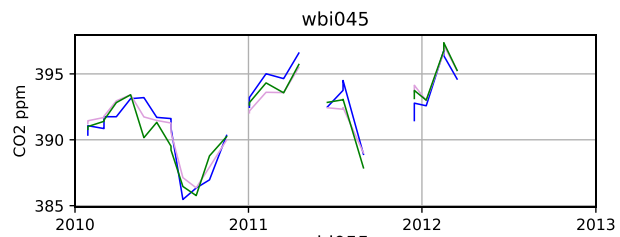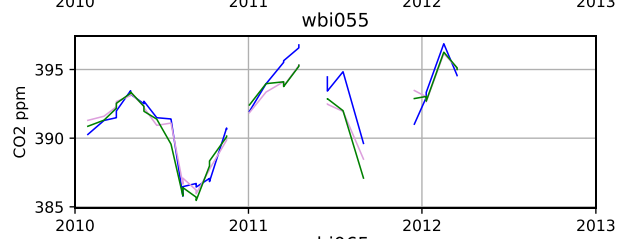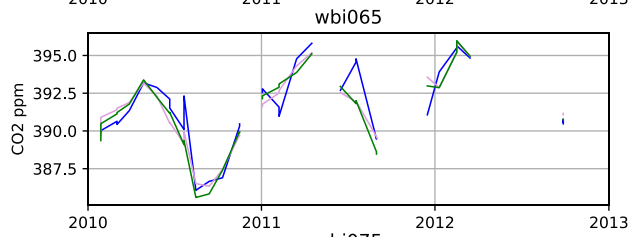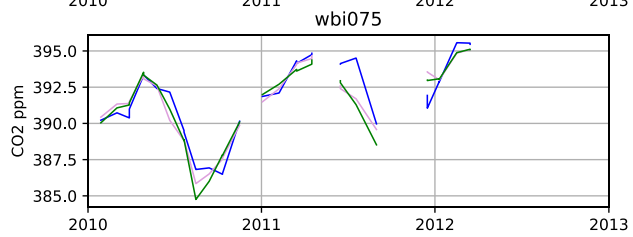

Supplement: Supplementary file 1 [file acp-2020-251-supplement.pdf]
